# Supplementary material
Source: ML conference proceedings conference paper supplement (https://openaccess.thecvf.com/content/ICCV2025/html/Luo_Adding_Additional_Control_ICCV_2025_paper.html)
Supplement: Supplementary file 1 [file Luo_Adding_Additional_Control_ICCV_2025_supplemental.pdf]

# Adding Additional Control to One-Step Diffusion with Joint Distribution Matching

## Supplementary Material

### A. Proof of Lemma 3.1

Since we assume the condition  $c$  is discrete, its entropy  $\mathcal{H}(c)$  and conditional entropy  $\mathcal{H}(c|\mathbf{x}_t)$  would be non-negative. Combine  $\mathcal{H}(x_t, c) = \mathcal{H}(x_t) + \mathcal{H}(c|x_t)$ , we have:

$$\begin{aligned}\mathcal{H}(x_t, c) &= -\mathbb{E}_{p_\theta(\mathbf{x}_t, c)} \log p_\theta(\mathbf{x}_t, c) \\ &\geq \mathcal{H}(x_t) = -\mathbb{E}_{p_\theta(\mathbf{x}_t)} \log p_\theta(\mathbf{x}_t).\end{aligned}\tag{13}$$

By substituting Eq. (13) into the integral joint KL divergence  $\mathbb{E}_t \lambda_t \text{KL}(p_\theta(\mathbf{x}_t, c) || p(\mathbf{x}_t, c))$ , we have:

$$\begin{aligned}\mathbb{E}_t \lambda_t \text{KL}(p_\theta(\mathbf{x}_t, c) || p(\mathbf{x}_t, c)) &= -\lambda_t \mathbb{E}_{p_\theta(\mathbf{x}_t|c)p(c), t} \log p(c|\mathbf{x}_t)p_\phi(\mathbf{x}_t) + \lambda_t \mathbb{E}_{p_\theta(\mathbf{x}_t, c)} \log p_\theta(\mathbf{x}_t, c) \\ &\leq -\lambda_t \mathbb{E}_{p_\theta(\mathbf{x}_t|c)p(c), t} \log p(c|\mathbf{x}_t)p_\phi(\mathbf{x}_t) + \lambda_t \mathbb{E}_{p_\theta(\mathbf{x}_t)} \log p_\theta(\mathbf{x}_t) \\ &= \lambda_t \mathbb{E}_{p_\theta(\mathbf{x}_t|c)p(c), t} [-\log p(c|\mathbf{x}_t)p_\phi(\mathbf{x}_t) + \log p_\theta(\mathbf{x}_t)]\end{aligned}\tag{14}$$

This completes the proof.

### B. Details of conditions

- Canny: a canny edge detector [3] is employed to generate canny edges;
- Hed: a holistically-nested edge detection model is utilized for the purpose;
- Depthmap: we employ the Midas [24] for depth estimation;
- Super-resolution: we use the nearest kernel to downscale the images by a factor of 8 as the condition.
